# Supplementary material for: Binder-free three-dimensional interconnected CuV2O5·nH2O nests as cathodes for high-loading aqueous zinc-ion batteries
Source: Royal Society of Chemistry journal article supplement (doi:10.1039/d1qi01499d), 2022-01-01
Supplement: d1qi01499d1.pdf [file d1qi01499d1.pdf]

## Supporting information

### **Binder-free three-dimensional interconnected $\text{CuV}_2\text{O}_5 \cdot n\text{H}_2\text{O}$ nest as cathodes for high-loading aqueous zinc-ion batteries**

Jie Ren <sup>a</sup>, Ping Hong <sup>a</sup>, Yan Ran <sup>a</sup>, Yunhua Chen <sup>b</sup>, Xuechun Xiao <sup>a\*</sup>, Yude Wang <sup>c\*</sup>

*a School of Materials and Energy, Yunnan University, 650504 Kunming, People's  
Republic of China*

*b Department of Physics, 650504 Kunming, People's Republic of China*

*c National Center for International Research on Photoelectric and Energy Materials,  
Yunnan University, 650504 Kunming, People's Republic of China*

#### **\*Corresponding author:**

xchxiao@ynu.edu.cn (X. C. Xiao); Fax: +86-871-65153832, Tel: +86-871-65035570,

ydwang@ynu.edu.cn (Y. D. Wang).

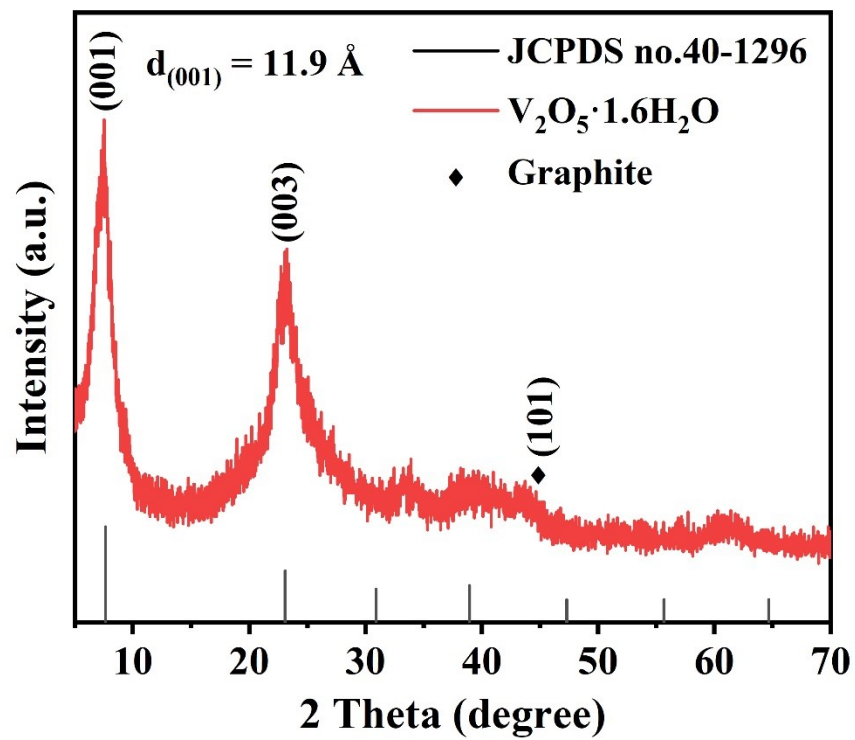

Fig. S1 XRD patterns of VOH@CC.

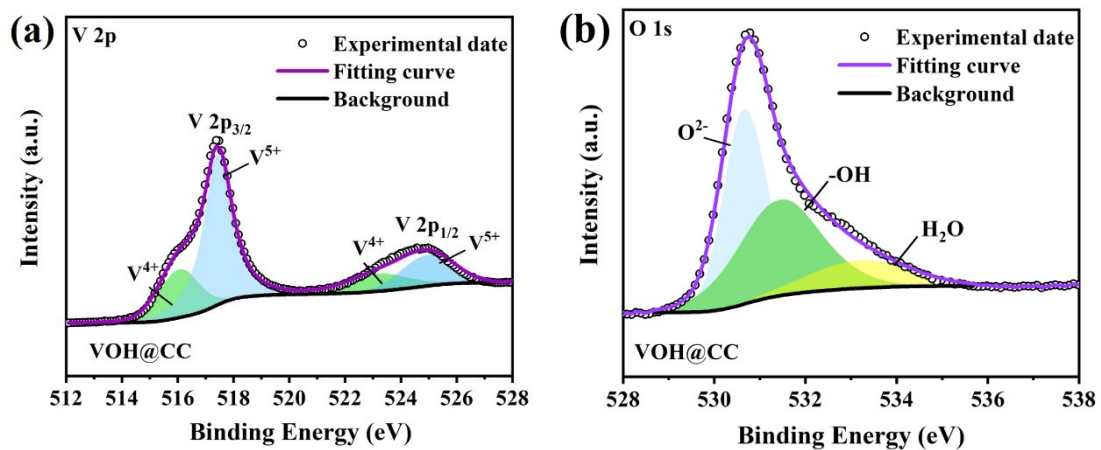

Fig. S2 The XPS spectra of V 2p (A) and O1s (B) of VOH@CC.

**Table S1** ICP test results of CuVOH @ CC

| Line | Conc.1 (mg/L) | RSD (%) | Conc.2 (mg/L) | Molar ratio |
|------|---------------|---------|---------------|-------------|
| Cu   | 47.048        | 2.21    | 47.048        | 1           |
| V    | 426.97        | 1.31    | 426.97        | 11.32       |

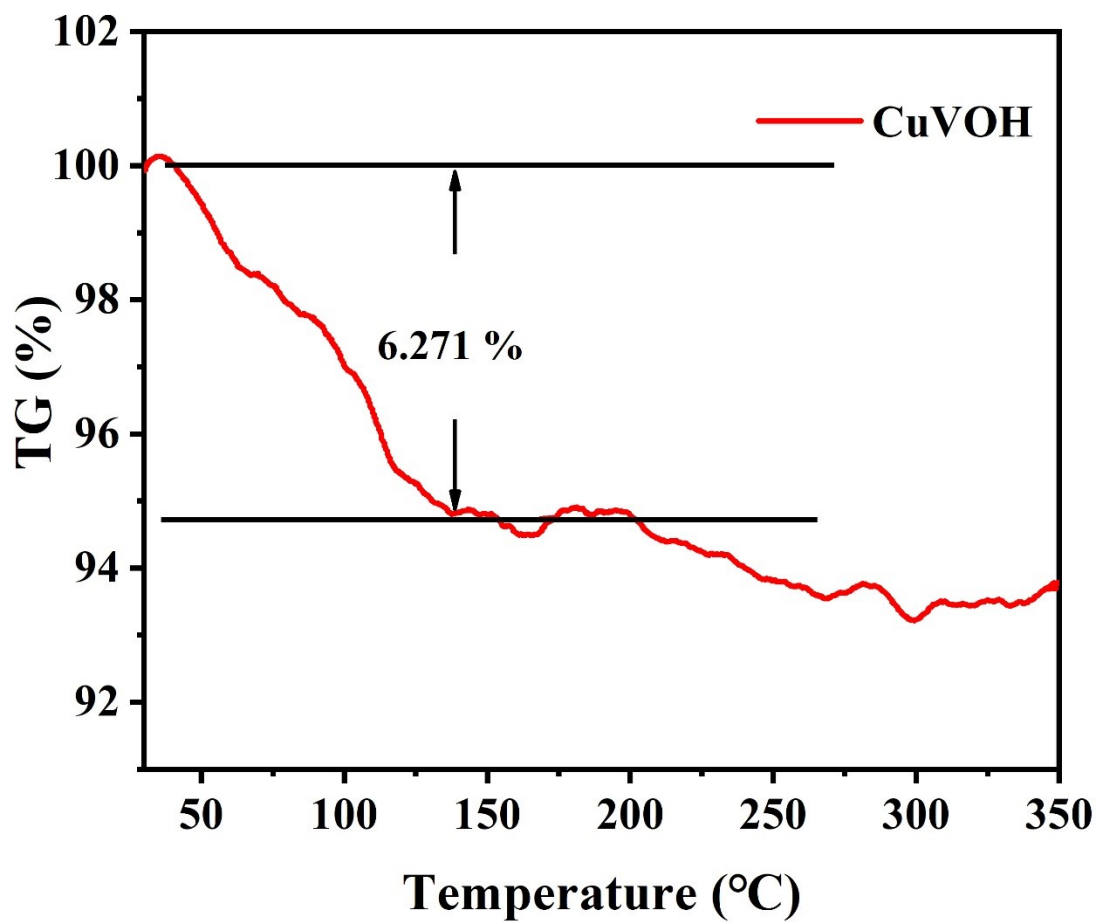

Fig. S3 TGA image of CuVOH@CC.

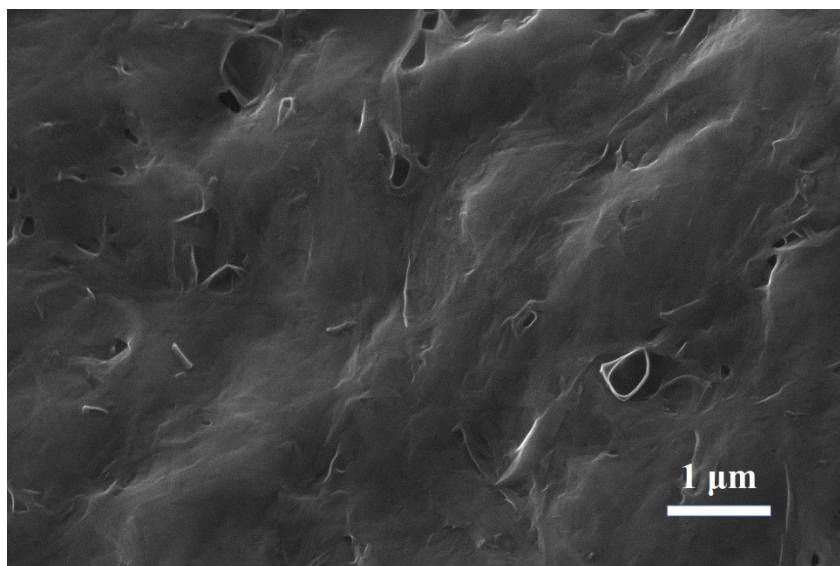

**Fig. S4** SEM image of VOH@CC.

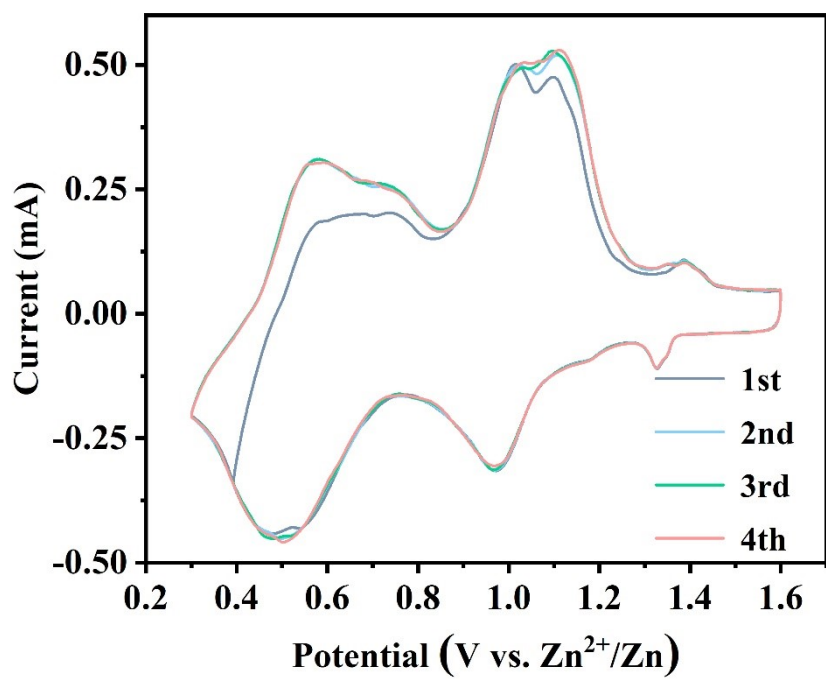

Fig. S5 CV curve at 0.1 mV s<sup>-1</sup> of the VOH@CC.

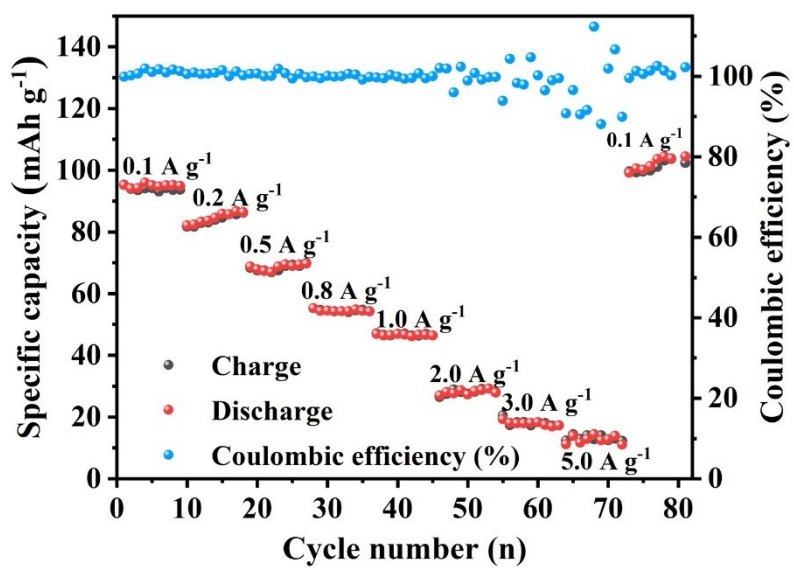

Fig. S6 Rate capabilities of VOH@CC at various current densities.



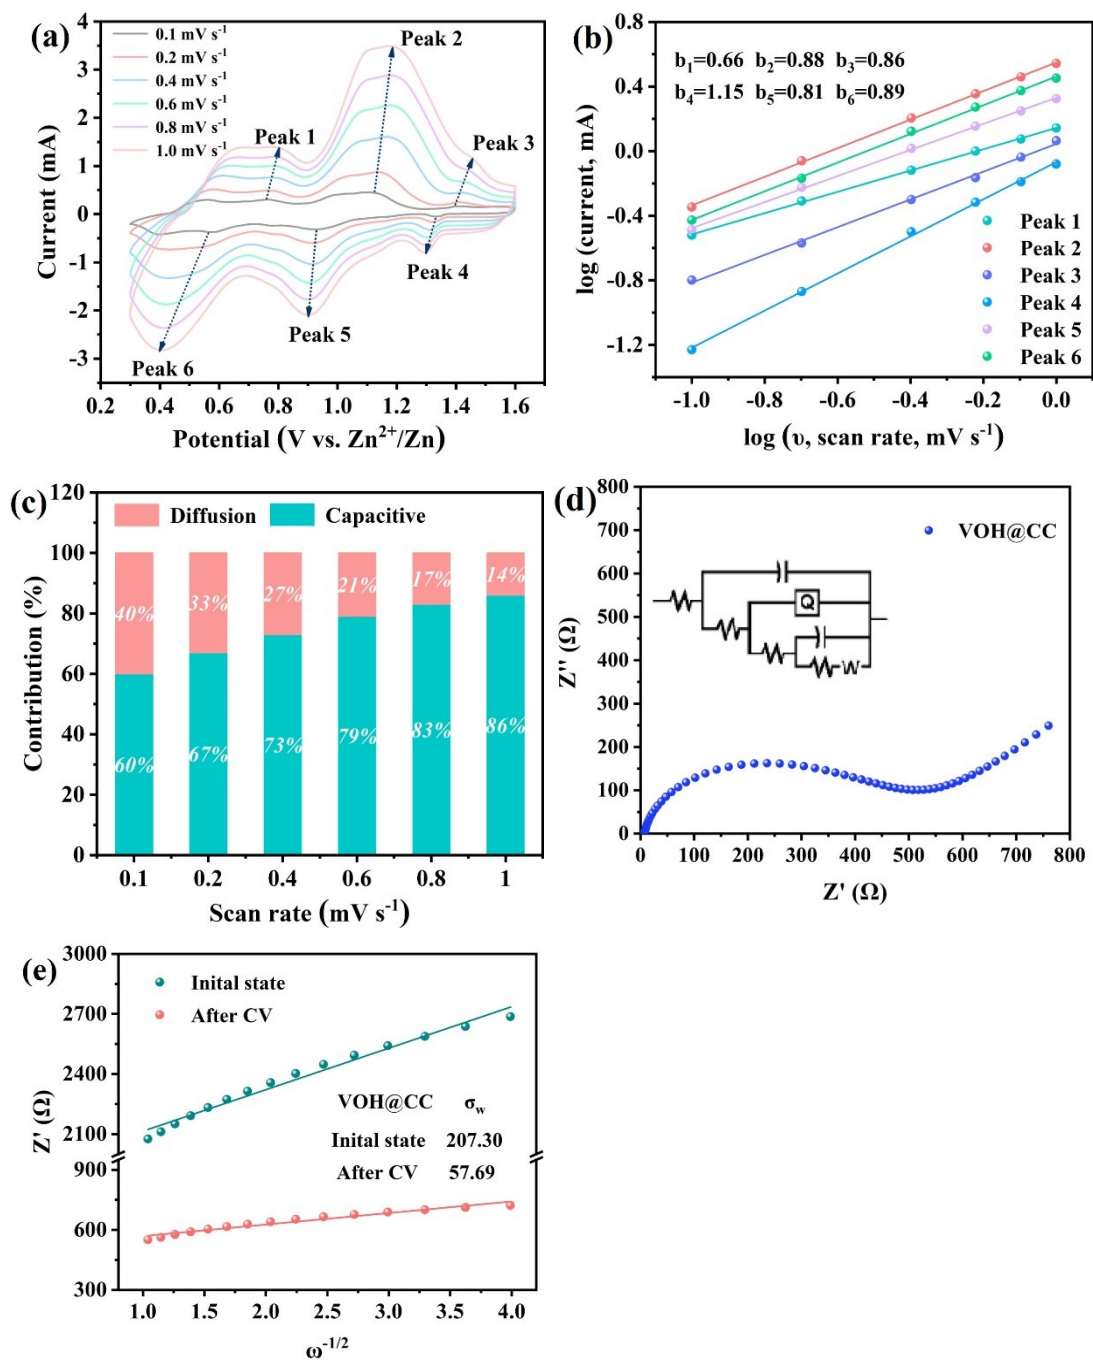

**Fig. S7** (a) CV diagram at different scanning speeds, (b) log (*i*) vs. log (*v*) linear relationship between cathode peak and anode peak at different scan speeds, (c) Pseudocapacitance contribution under 0.1-1.0 mV s<sup>-1</sup>, (d) EIS and (d) Z' vs.  $\omega^{-1/2}$  linear relationship image of the VOH@CC.

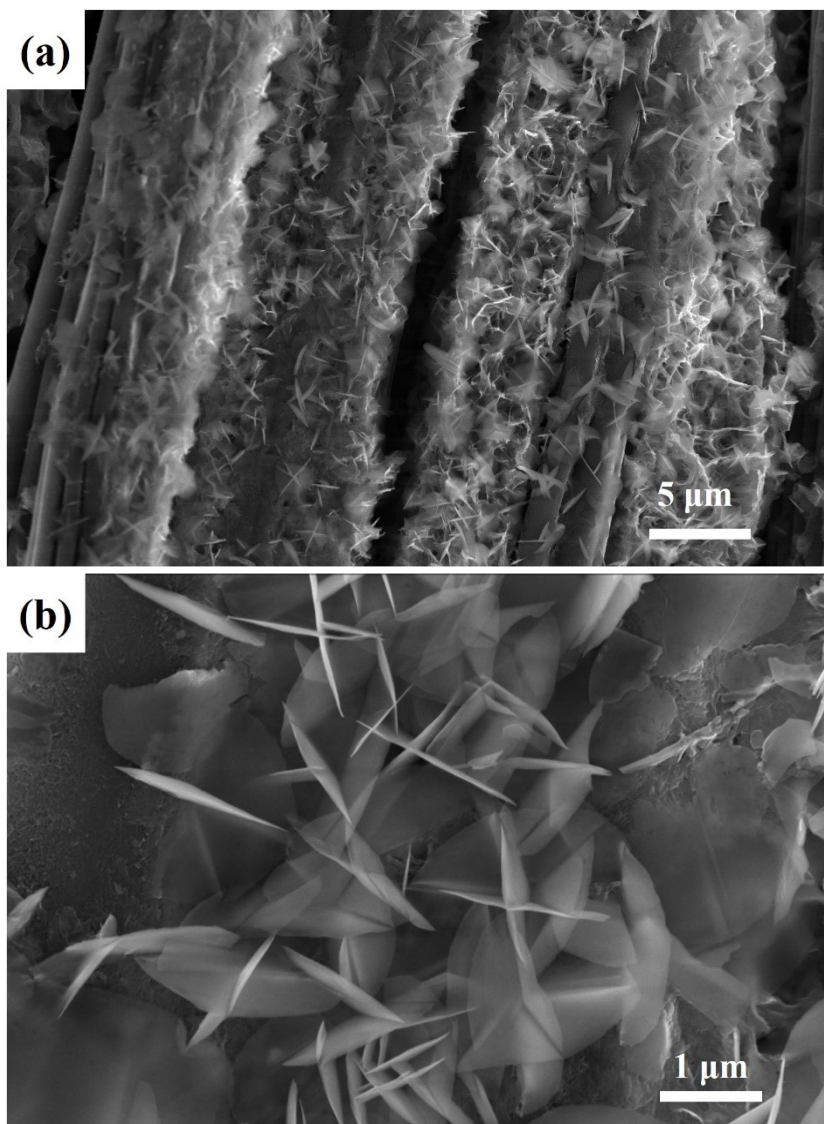

**Fig. S8** SEM images of the CuVOH@CC after cycling.

**Table S2** Performance and mass loading of different vanadium-based cathodes

| Materials                                                                        | Collector              | Areal capacity<br>(mAh cm <sup>-2</sup> ) | Cycling performance                                | Mass<br>Loading<br>(mg cm <sup>-2</sup> ) | Ref.                 |
|----------------------------------------------------------------------------------|------------------------|-------------------------------------------|----------------------------------------------------|-------------------------------------------|----------------------|
| Al-V <sub>10</sub> V <sub>24</sub> ·12H <sub>2</sub> O                           | graphite<br>sheet      | 0.719 at 1 A g <sup>-1</sup>              | 98% after 3000 cycles<br>at 5 A g <sup>-1</sup>    | 1.8                                       | 1                    |
| (NH <sub>4</sub> ) <sub>x</sub> V <sub>2</sub> O <sub>5</sub> ·nH <sub>2</sub> O | stainless<br>steel     | 0.625 at 0.5 A g <sup>-1</sup>            | 53% after 400 cycles<br>at 2 A g <sup>-1</sup>     | 1.6                                       | 2                    |
| VO <sub>2</sub> (M)/CNT                                                          | --                     | 0.379 at 1 A g <sup>-1</sup>              | 93.8% after 5000<br>cycles at 20 A g <sup>-1</sup> | 1.1                                       | 3                    |
| VO <sub>2</sub> (D)                                                              | Ti net                 | 0.628 at 0.1 A g <sup>-1</sup>            | 56% after 10000<br>cycles at 10 A g <sup>-1</sup>  | 1.2-1.5                                   | 4                    |
| V <sub>2</sub> O <sub>3</sub> @C                                                 | stainless<br>steel net | 0.671 at 0.1 A g <sup>-1</sup>            | 90% after 4000 cycles<br>at 5 A g <sup>-1</sup>    | 2.0                                       | 5                    |
| V <sub>6</sub> O <sub>13</sub>                                                   | carbon<br>cloth        | 0.446 at 0.375 A g <sup>-1</sup>          | 99% after 1000 cycles<br>at 9 A g <sup>-1</sup>    | 1.0                                       | 6                    |
| V <sub>6</sub> O <sub>13</sub>                                                   | carbon<br>cloth        | 0.825 at 0.5 A g <sup>-1</sup>            | 85.3% after 1000<br>cycles at 2 A g <sup>-1</sup>  | 1.5                                       | 7                    |
| NH <sub>4</sub> V <sub>3</sub> O <sub>8</sub> ·0.5H <sub>2</sub> O               | Ti foil                | 0.576 at 1 A g <sup>-1</sup>              | 85% after 120 cycles<br>at 0.2 A g <sup>-1</sup>   | 1.3                                       | 8                    |
| CuVOH@CC                                                                         | carbon<br>cloth        | 1.563 at 1 A g <sup>-1</sup>              | 50% after 2000 cycles<br>at 1 A g <sup>-1</sup>    | ~7.0                                      | <b>This<br/>work</b> |

## Reference

1. L. Qian, T. Wei, K. Ma, G. Yang, and C. Wang, Boosting the cyclic stability of aqueous zinc-ion battery based on Al-Doped V<sub>10</sub>O<sub>24</sub>·12H<sub>2</sub>O cathode materials, *ACS Applied Materials & Interfaces*, 2019, **11**, 20888-20894.
2. H. Zhao, Q. Fu, D. Yang, A. Sarapulova, Q. Pang, Y. Meng, L. Wei, H. Ehrenberg, Y. Wei, C. Wang, and G. Chen, In operando synchrotron studies of NH<sub>4</sub>(+) preintercalated V<sub>2</sub>O<sub>5</sub>·nH<sub>2</sub>O nanobelts as the cathode material for aqueous rechargeable zinc batteries, *ACS Nano*, 2020, **14**, 11809-11820.
3. L. Zhang, L. Miao, B. Zhang, J. Wang, J. Liu, Q. Tan, H. Wan, and J. Jiang, A durable VO<sub>2</sub>(M)/Zn battery with ultrahigh rate capability enabled by pseudocapacitive proton insertion, *Journal of Materials Chemistry A*, 2020, **8**, 1731-1740.
4. L. Chen, Z. Yang and Y. Huang, Monoclinic VO<sub>2</sub>(D) hollow nanospheres with super-long cycle life for aqueous zinc ion batteries, *Nanoscale*, 2019, **11**, 13032-13039.
5. Y. Ding, Y. Peng, S. Chen, X. Zhang, Z. Li, L. Zhu, L. E. Mo, and L. Hu, Hierarchical porous metallic V<sub>2</sub>O<sub>3</sub>@C for advanced aqueous zinc-ion batteries, *ACS Applied Materials & Interfaces*, 2019, **11**, 44109-44117.
6. M. Tamilselvan, T. V. M. Sreekanth, K. Yoo and J. Kim, Binder-free coaxially grown V<sub>6</sub>O<sub>13</sub> nanobelts on carbon cloth as cathodes for highly reversible aqueous zinc ion batteries, *Applied Surface Science*, 2020, **529**, 147077.
7. P. He, J. Liu, X. Zhao, Z. Ding, P. Gao, and L.-Z. Fan, A three-dimensional interconnected V<sub>6</sub>O<sub>13</sub> nest with a V<sup>5+</sup>-rich state for ultrahigh Zn ion storage,

*Journal of Materials Chemistry A*, 2020, **8**, 10370-10376.

8. H. Jiang, Y. Zhang, Z. Pan, L. Xu, J. Zheng, Z. Gao, T. Hu, C. Meng, and J. Wang, NH<sub>4</sub>V<sub>3</sub>O<sub>8</sub>·0.5H<sub>2</sub>O nanobelts with intercalated water molecules as a high performance zinc ion battery cathode, *Materials Chemistry Frontiers*, 2020, **4**, 1434-1443.
